# Supplementary material for: Endogenous Levels of Gamma Amino-Butyric Acid Are Correlated to Glutamic-Acid Decarboxylase Antibody Levels in Type 1 Diabetes
Source: MDPI journal article supplement (doi:10.3390/biomedicines10010091), 2021-12-31
Supplement: s1 [file s1]

**Supplementary Table S1 – Analyzed circulating cytokines**

| <b>Catalog #HCYP4MAG-64K</b> | <b>HC (n=27)</b> | <b>T1D (n=56)</b> |
|------------------------------|------------------|-------------------|
| Interferon-beta (pg/mL)      | 705 ± 105        | 608 ± 79          |
| IL-19 (pg/mL)                | 708 ± 32         | 709 ± 14          |
| IL-24 (ng/mL)                | n/a              | n/a               |
| IL-34 (pg/mL)                | n/a              | n/a               |
| IL-35 (ng/mL)                | n/a              | n/a               |
| IL-36 beta (pg/mL)           | 6.2 ± 0.8        | 6.5 ± 0.6         |
| IL-37 (pg/mL)                | 21.3 ± 4.3       | 19.2 ± 3.0        |
| IL-38 (pg/mL)                | 55.9 ± 6.6       | 52.1 ± 6.0        |
| <b>Catalog #HTH17MAG-14K</b> |                  |                   |
| TNF-alpha (pg/mL)            | 57.6 ± 4.5       | 64.3 ± 3.6        |
| TNF-beta                     | 0.20 ± 0.06      | 0.23 ± 0.06       |
| Interferon-gamma (pg/mL)     | 181 ± 24         | 176 ± 9           |
| IL-1 beta (pg/mL)            | 17.1 ± 5.9       | 13.0 ± 0.98       |
| IL-2 (pg/mL)                 | 41.9 ± 16.4      | 31.4 ± 2.1        |
| IL-4 (ng/mL)                 | 0.5 ± 0.07       | 0.5 ± 0.05        |
| IL-5 (pg/mL)                 | 56.3 ± 7.8       | 58.5 ± 5.7        |
| IL-6 (pg/mL)                 | 49.2 ± 12.7      | 54.2 ± 12.6       |
| IL-9 (pg/mL)                 | 61.9 ± 11.0      | 60.0 ± 4.8        |
| IL-10 (pg/mL)                | 29.2 ± 3.4       | 31.9 ± 2.7        |
| IL-12p70 (pg/mL)             | 40.2 ± 7.1       | 38.1 ± 2.8        |
| IL-13 (pg/mL)                | 142 ± 34         | 154 ± 31          |
| IL-15 (pg/mL)                | 44.8 ± 7.0       | 45.5 ± 3.6        |
| IL-17A (pg/mL)               | 42.6 ± 18.8      | 24.0 ± 2.0        |
| IL-17E (ng/mL)               | 0.35 ± 0.19      | 0.20 ± 0.02       |
| IL-17F (ng/mL)               | 0.075 ± 0.02     | 0.079 ± 0.009     |
| IL-21 (pg/mL)                | 69.1 ± 10.1      | 67.7 ± 4.9        |
| IL-22 (ng/mL)                | n/a              | n/a               |
| IL-23 (ng/mL)                | 6.2 ± 1.1        | 7.7 ± 0.92        |
| IL-27 (ng/mL)                | 1.3 ± 0.08       | 1.4 ± 0.07        |
| IL-28A (ng/mL)               | 2.2 ± 0.36       | 2.2 ± 0.24        |
| IL-31 (ng/mL)                | 0.13 ± 0.04      | 0.12 ± 0.01       |
| IL-33 (pg/mL)                | 140 ± 14         | 161 ± 11          |

Circulating cytokines in plasma were analyzed with magnetic bead-based Luminex using two commercially available assays Merck Millipore (Burlington, MA, USA) according to the manufacturer's protocol. IL-22, IL-24, IL-34, and IL-35 were excluded from data analysis since >50% of the samples were below the detection level. Comparisons between the two

groups were performed using an unpaired two-tailed t-test. Data are presented as means  $\pm$  SEM.
